# Supplementary material
Source: publisher site journal article supplement (https://www.dovepress.com/article/279496)
Supplement: Supplementary file 1 [file get_supplementary_file.php]

Supplementary figure S1


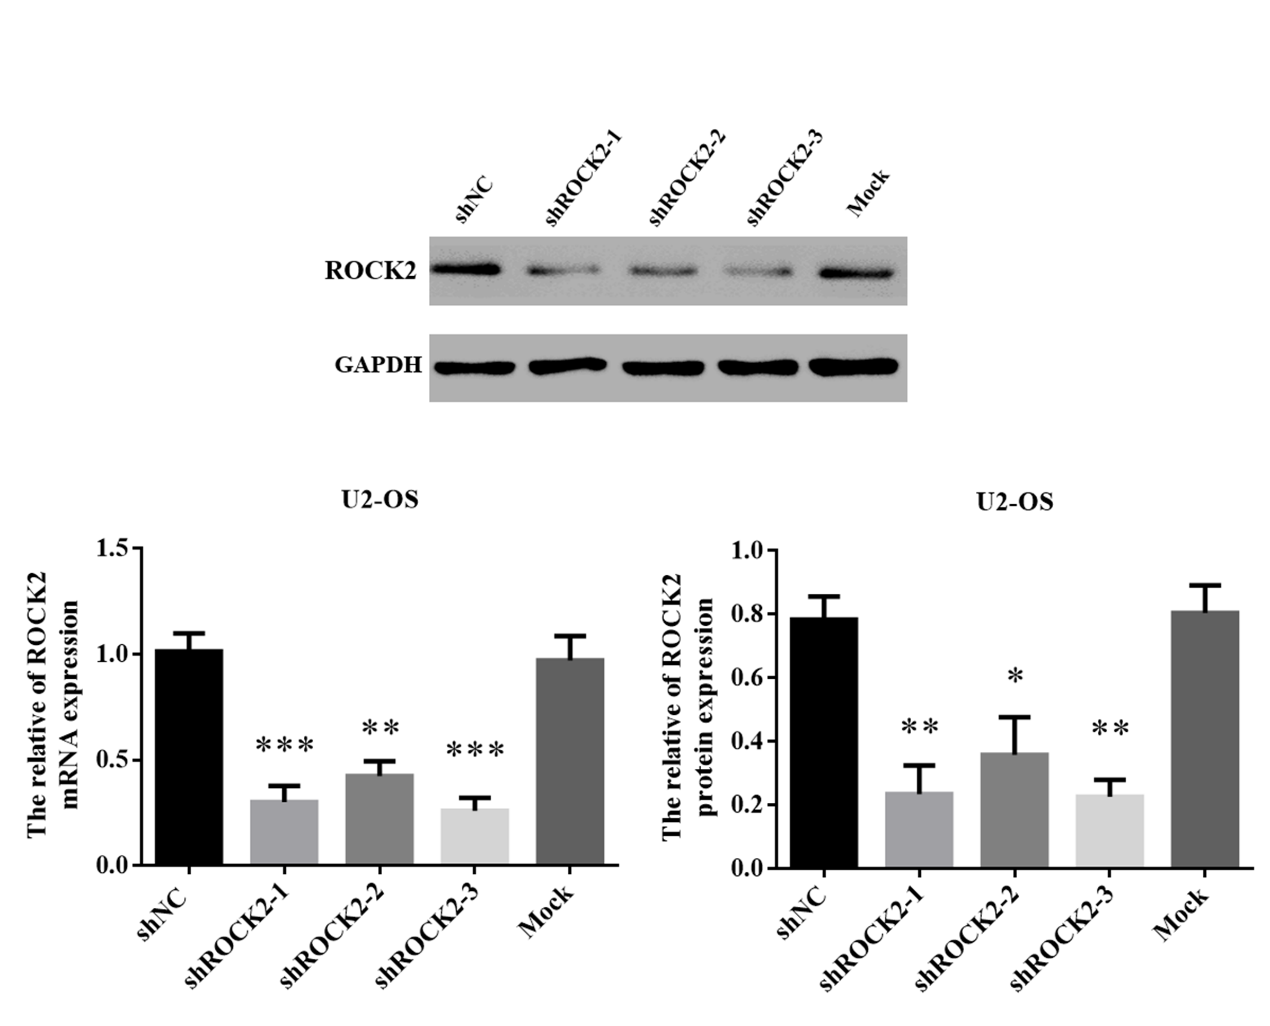


Supplementary figure S2


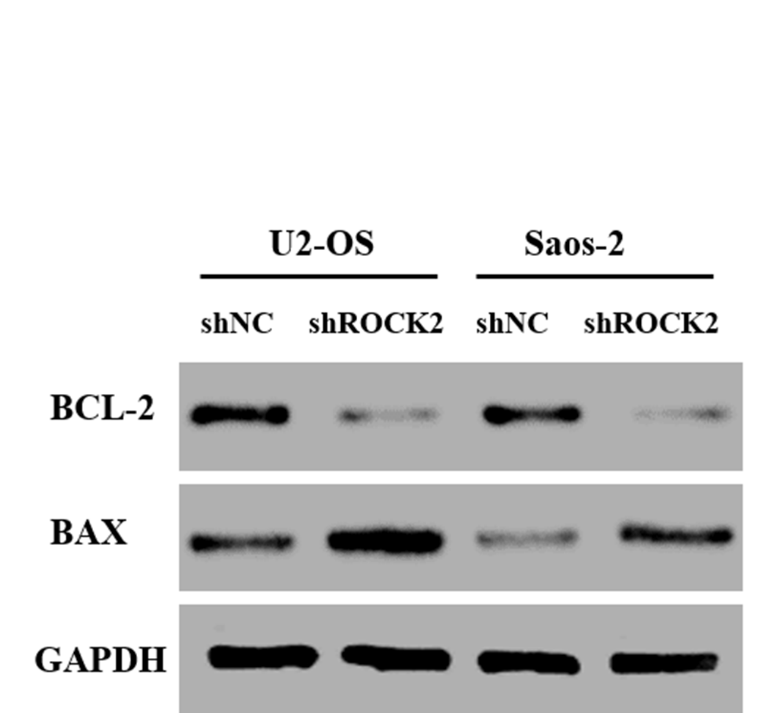


Supplementary figure S3


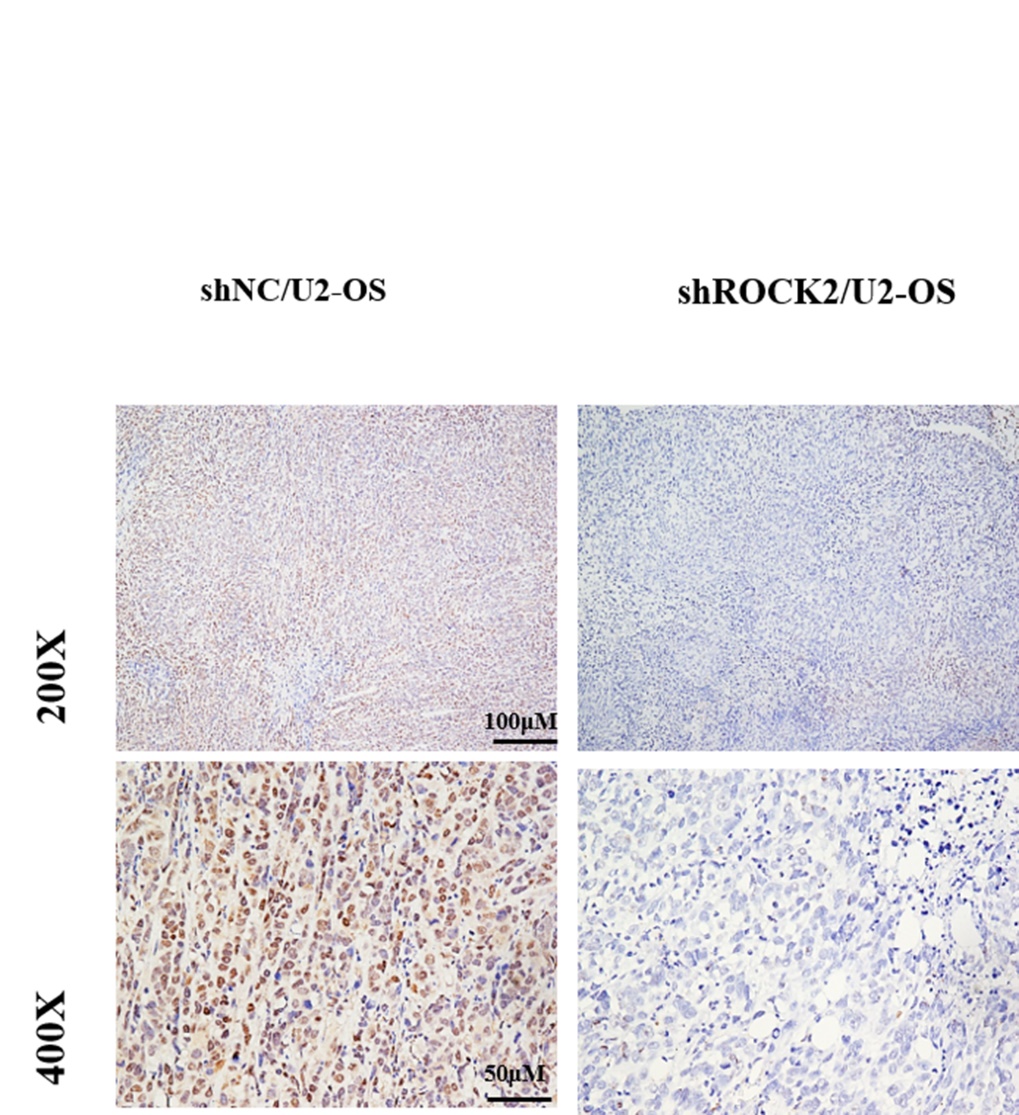


Supplementary figure S4


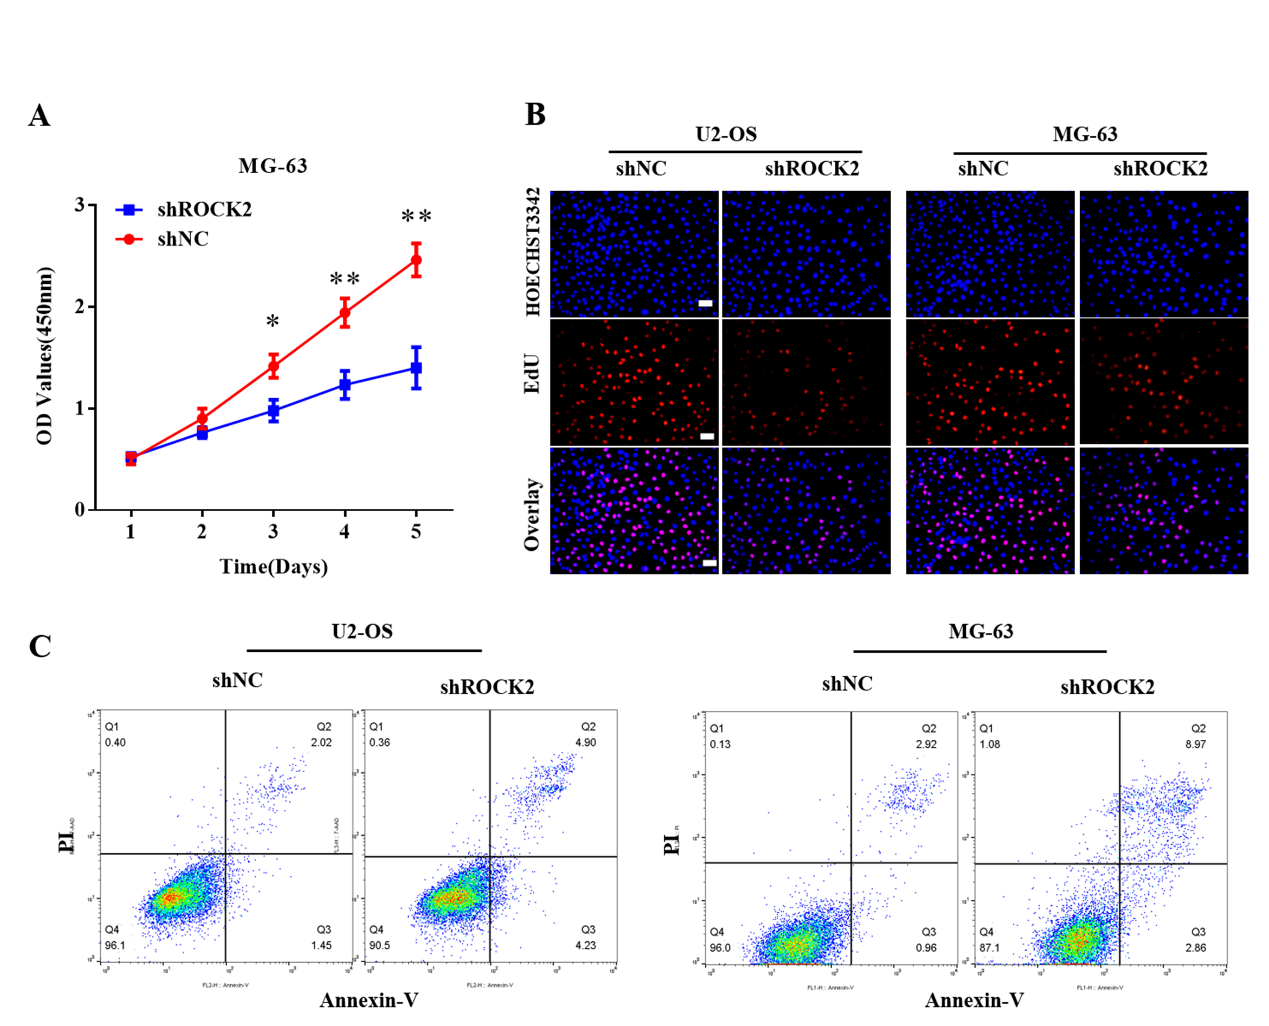


Supplementary figure S5


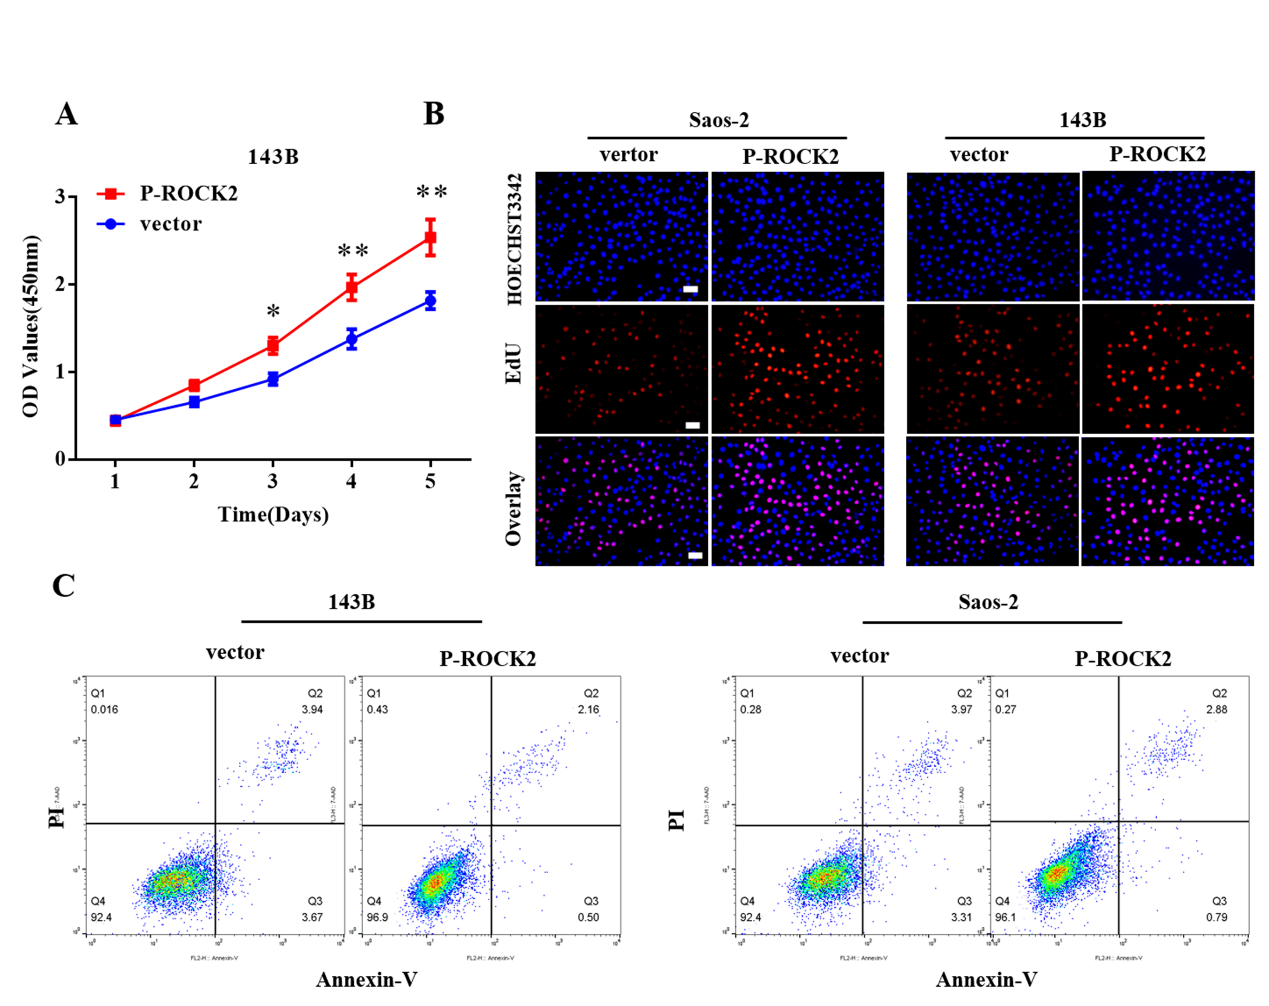


Supplementary figure S6


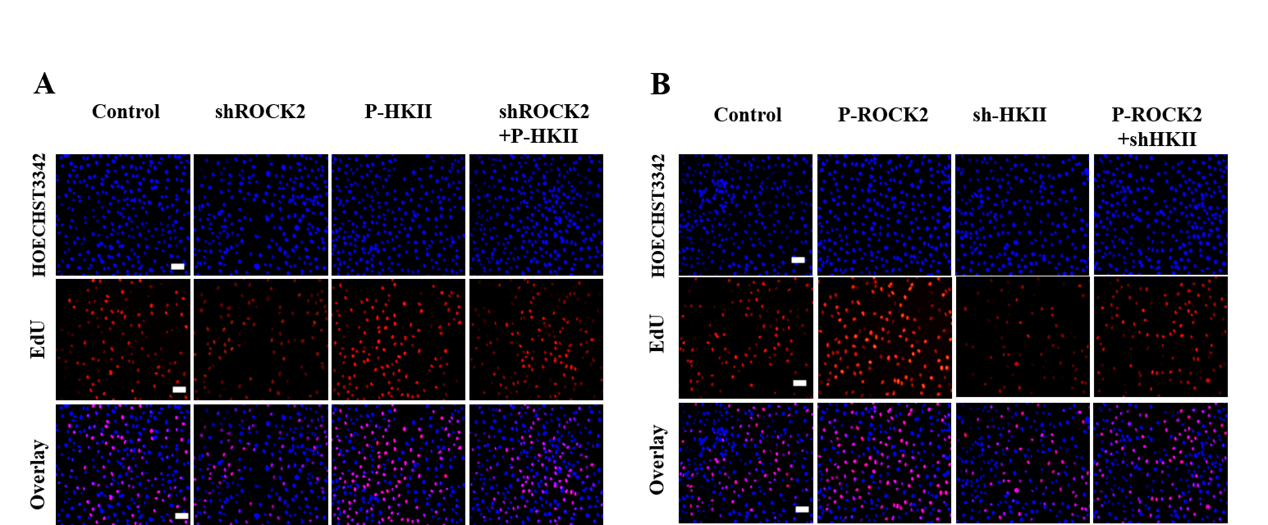


Supplementary figure S7


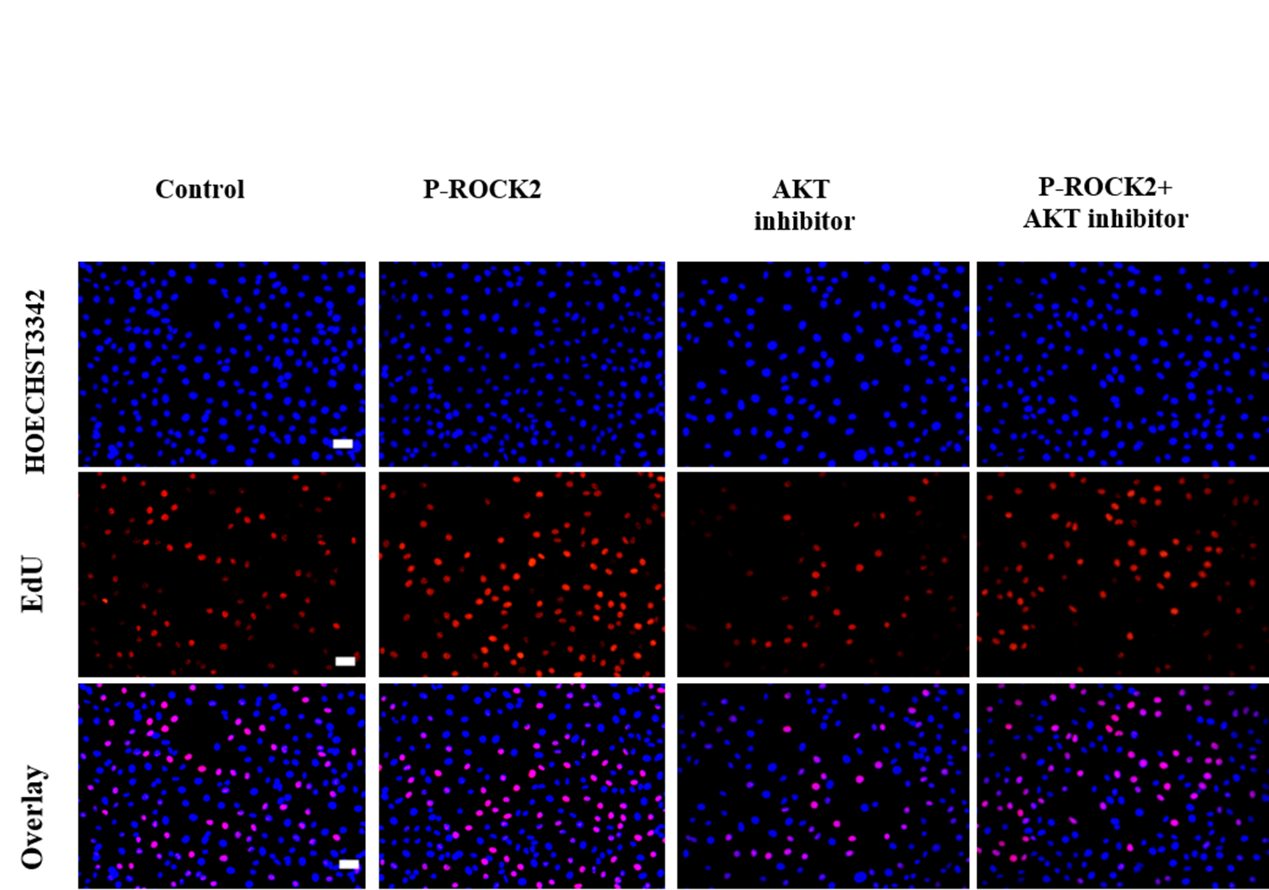


\

**Supplement Figure legends**

**Supplement Figure S1.** ROCK2 expression decreased after transfection of the corresponding shRNA plasmids. Efficiency of ROCK2 silencing in OS cell lines was measured by qRT-PCR and western blot.

**Supplement Figure S2.** Bcl-2 and BAX protein expression levels after knockdown of ROCK2 expression.

**Supplement Figure S3** Tumor sizes of 143B-shNC and 143B-shROCK2 groups of nude mice were measured by IHC.

**Supplement Figure S4 (A)** Cell counting kit 8 and **(B)** EdU assays demonstrated a decrease in shROCK2-transfected OS cell (U2-OS and MG-63) growth compared with shNC-transfected cells (scale bars:100μM). **(C)** Flow cytometry analysis of OS cell apoptosis following ROCK2 silencing.

**Supplement Figure S5 (A)** CCK8 and **(B)** EdU assays confirmed that the proliferation of OS cells was significantly increased (scale bars:100μM). (C) following ROCK2 overexpression, flow cytometry was performed to determine the apoptosis rate of OS cells.

**Supplement Figure S6 (A)** EdU results demonstrated the proliferation of U2-OS shROCK2 cells stably transfected with P-HKII. **(B)** EdU results demonstrated the proliferation of Saos-2 cells transfected with p-ROCK2 in the presence or absence of shHKII.

**Supplement Figure S7** EdU results show the proliferation of p-ROCK2 cells after inhibition of PI3K/AKT signalling.
